# Supplementary material for: Opposing activities of oncogenic MIR17HG and tumor suppressive MIR100HG clusters and their gene targets regulate replicative senescence in human adult stem cells
Source: PubMed Central journal article supplement (PMC5460214; doi:10.1038/s41514-017-0006-y), 2017-04-20
Supplement: 41514_2017_6_MOESM7_ESM.pdf [file 41514_2017_6_MOESM7_ESM.pdf]

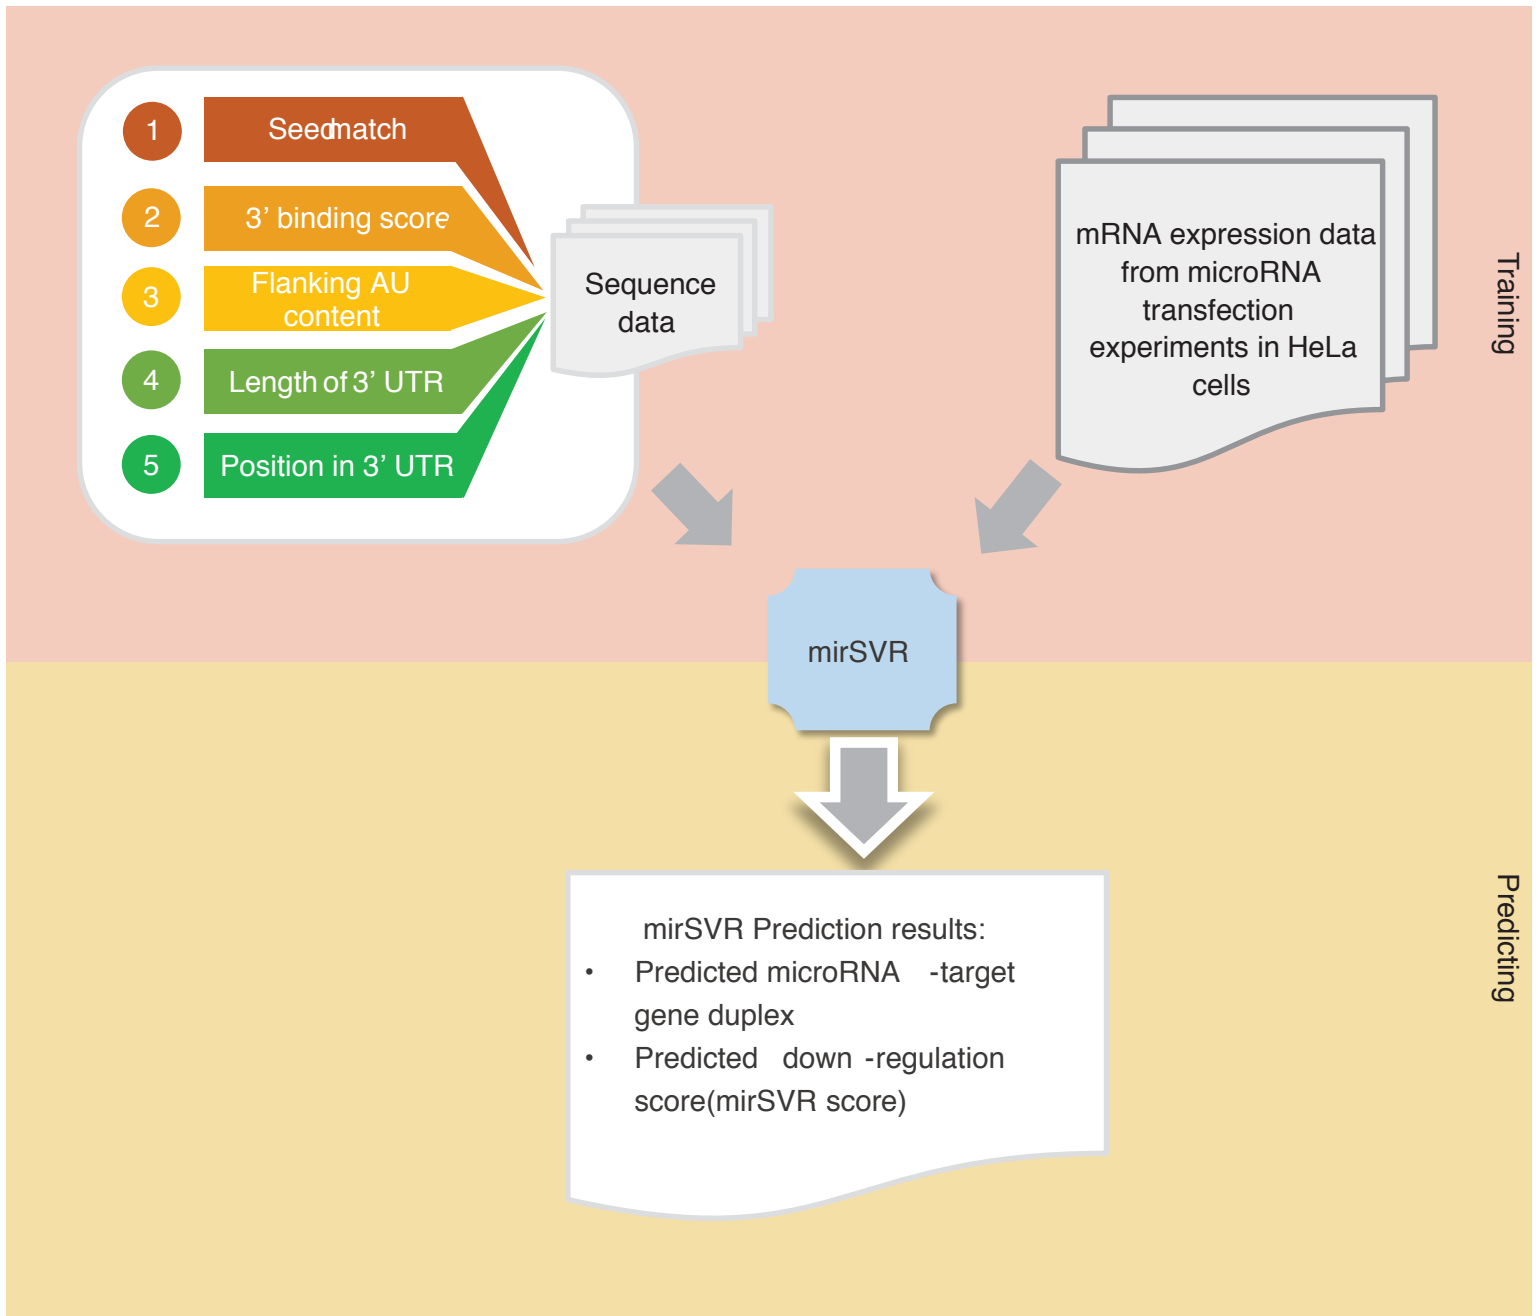

Suppl. Fig.6
